# Supplementary material for: Lung function after preterm birth: development from mid-childhood to adulthood
Source: HighWire-hosted journal article supplement (doi:10.1136/thoraxjnl-2012-202980), 2013-06-07
Supplement: thoraxjnl-2012-202980supp_table3E.pdf [file thoraxjnl-2012-202980supp_table3E.pdf]

**Table 3E:** Height and weight from 10 to 25 years of age for 83 subjects born extremely preterm (EP) with and without neonatal bronchopulmonary dysplasia (BPD) and 81 control subjects born at term,

**Males** \*

|                                          |             | 1991-92 cohort                            |                         |                        | 1982-85 cohort                            |                         |                        |
|------------------------------------------|-------------|-------------------------------------------|-------------------------|------------------------|-------------------------------------------|-------------------------|------------------------|
|                                          |             | Development from childhood to adolescence |                         |                        | Development from adolescence to adulthood |                         |                        |
| Examination                              |             | First                                     | Second                  | Difference<br>$\Delta$ | First                                     | Second                  | Difference<br>$\Delta$ |
| <b>Age (years); mean (SD)</b>            |             | <b>10.5 (0.4)</b>                         | <b>17.8 (0.4)</b>       | <b>7.3 (0.4)</b>       | <b>17.7 (1.2)</b>                         | <b>24.9 (1.2)</b>       | <b>7.2 (0.4)</b>       |
| <b>Height; cm;<br/>mean<br/>(95% CI)</b> | Control     | 145.7<br>(142.0, 149.3)                   | 179.1<br>(174.8, 183.3) | 33.4<br>(30.0, 36.8)   | 176.9<br>(174.4, 179.3)                   | 177.5<br>(175.0, 179.9) | 0.6<br>(-0.3, 1.5)     |
|                                          | EP non BPD  | 132.6<br>(123.2, 141.9)                   | 168.3<br>(158.6, 177.9) | 35.7<br>(28.6, 42.8)   | 180.3<br>(175.3, 185.3)                   | 180.4<br>(175.5, 185.3) | 0.2<br>(-1.7, 2.0)     |
|                                          | EP mild BPD | 141.3<br>(134.7, 147.9)                   | 175.7<br>(168.9, 182.5) | 34.4<br>(29.4, 39.4)   | 173.4<br>(170.0, 176.7)                   | 173.7<br>(170.4, 177.1) | 0.4<br>(-0.8, 1.5)     |
|                                          | EP m/s BPD  | 139.5<br>(134.5, 144.5)                   | 175.2<br>(170.1, 180.4) | 35.7<br>(31.9, 39.4)   | 172.0<br>(167.6, 176.3)                   | 173.0<br>(168.7, 177.3) | 1.0<br>(-0.6, 2.7)     |
| <b>Weight; kg;<br/>mean<br/>(95% CI)</b> | Control     | 37.8<br>(34.4, 43.2)                      | 74.5<br>(64.8, 84.3)    | 36.7<br>(28.5, 44.9)   | 67.9<br>(63.2, 72.6)                      | 76.6<br>(71.6, 81.7)    | 8.7<br>(4.2, 13.3)     |
|                                          | EP non BPD  | 30.9<br>(17.1, 44.6)                      | 68.7<br>(47.3, 90.1)    | 37.9<br>(21.5, 54.2)   | 80.5<br>(70.2, 90.7)                      | 93.1<br>(83.3, 102.9)   | 12.6<br>(3.3, 21.9)    |
|                                          | EP mild BPD | 42.2<br>(32.5, 52.0)                      | 83.3<br>(68.1, 98.4)    | 41.1<br>(29.5, 52.6)   | 62.4<br>(55.8, 68.9)                      | 78.3<br>(71.7, 85.0)    | 15.9<br>(10.0, 21.8)   |
|                                          | EP m/s BPD  | 31.2<br>(23.8, 38.5)                      | 67.6<br>(56.2, 79.1)    | 36.5<br>(27.7, 45.2)   | 60.0<br>(51.3, 68.7)                      | 69.5<br>(60.7, 78.4)    | 9.5<br>(1.2, 17.9)     |

**Females \***

|                                          |             | 1991-92 cohort<br>Development from childhood to adolescence |                         |                        | 1982-85 cohort<br>Development from adolescence to adulthood |                         |                        |
|------------------------------------------|-------------|-------------------------------------------------------------|-------------------------|------------------------|-------------------------------------------------------------|-------------------------|------------------------|
| Examination                              |             | First                                                       | Second                  | Difference<br>$\Delta$ | First                                                       | Second                  | Difference<br>$\Delta$ |
| <b>Age (years); mean (SD)</b>            |             | <b>10.5 (0.4)</b>                                           | <b>17.8 (0.4)</b>       | <b>7.3 (0.4)</b>       | <b>17.7 (1.2)</b>                                           | <b>24.9 (1.2)</b>       | <b>7.2 (0.4)</b>       |
| <b>Height; cm;<br/>mean<br/>(95% CI)</b> | Control     | 144.2<br>(140.9, 147.5)                                     | 165.9<br>(163.0, 168.8) | 21.7<br>(19.7, 23.7)   | 168.2<br>(165.7, 170.7)                                     | 168.2<br>(165.7, 170.7) | 0.01<br>(-0.4, 0.4)    |
|                                          | EP non BPD  | 142.6<br>(136.7, 148.5)                                     | 162.3<br>(156.9, 167.7) | 19.7<br>(15.9, 23.6)   | 163.8<br>(158.7, 169.0)                                     | 164.0<br>(158.8, 169.2) | 0.2<br>(-0.5, 0.9)     |
|                                          | EP mild BPD | 138.9<br>(134.0, 143.9)                                     | 163.1<br>(158.7, 167.5) | 24.2<br>(21.1, 27.3)   | 162.9<br>(159.4, 166.4)                                     | 162.5<br>(159.0, 166.0) | -0.4<br>(-0.9, 0.1)    |
|                                          | EP m/s BPD  | 141.6<br>(134.7, 148.6)                                     | 163.3<br>(157.2, 169.3) | 21.6<br>(17.6, 25.6)   | 163.1<br>(158.0, 168.3)                                     | 163.6<br>(158.4, 168.8) | 0.5<br>(-0.2, 1.2)     |
| <b>Weight; kg;<br/>mean<br/>(95% CI)</b> | Control     | 38.5<br>(34.2, 42.8)                                        | 64.8<br>(56.1, 73.4)    | 26.2<br>(20.8, 31.6)   | 66.6<br>(60.1, 73.2)                                        | 72.0<br>(63.6, 80.4)    | 5.4<br>(1.9, 8.9)      |
|                                          | EP non BPD  | 40.1<br>(32.5, 47.7)                                        | 76.3<br>(60.5, 92.1)    | 36.2<br>(25.9, 46.5)   | 63.9<br>(50.5, 77.2)                                        | 74.4<br>(57.4, 91.4)    | 10.6<br>(3.9, 17.3)    |
|                                          | EP mild BPD | 32.5<br>(26.1, 38.9)                                        | 61.7<br>(48.6, 74.7)    | 29.2<br>(20.9, 37.5)   | 60.6<br>(51.5, 69.7)                                        | 62.0<br>(50.4, 73.6)    | 1.4<br>(-3.4, 6.5)     |
|                                          | EP m/s BPD  | 34.6<br>(25.6, 43.6)                                        | 62.4<br>(44.4, 80.4)    | 27.8<br>(16.8, 38.8)   | 56.4<br>(43.1, 69.8)                                        | 65.2<br>(48.2, 82.2)    | 8.7<br>(2.0, 15.4)     |

\*Figures are group mean values with 95% confidence intervals (CI) or group mean differences with 95% CI, except for age (mean value with standard deviations).  $\Delta$  denotes mean increase in age, height and weight from first to second examination. Abbreviations: EP = subjects born extreme preterm, i.e. with a gestational age  $\leq 28$  weeks or a birth weight  $\leq 1000$  gram, BPD = bronchopulmonary dysplasia, mild BPD = oxygen supplement at 28 postnatal days, m/s BPD = moderate/severe BPD, i.e. oxygen supplement at gestational age 36 weeks.
