# Supplementary material for: Lung function after preterm birth: development from mid-childhood to adulthood
Source: HighWire-hosted journal article supplement (doi:10.1136/thoraxjnl-2012-202980), 2013-06-07
Supplement: thoraxjnl-2012-202980supp_table4E.pdf [file thoraxjnl-2012-202980supp_table4E.pdf]

**Table 4E:** Spirometric lung function data expressed as percentage predicted from 10 to 25 years of age for 83 subjects born extremely preterm (EP) with and without neonatal bronchopulmonary dysplasia (BPD) and 81 term-born control subjects.

|                                      |                           | 1991-92 cohort.                           |                        |                    | 1982-85 cohort.                           |                        |                      |
|--------------------------------------|---------------------------|-------------------------------------------|------------------------|--------------------|-------------------------------------------|------------------------|----------------------|
|                                      |                           | Development from childhood to adolescence |                        |                    | Development from adolescence to adulthood |                        |                      |
| Examination                          |                           | First                                     | Second                 |                    | First                                     | Second                 |                      |
| Age (years), mean (SD)               |                           | 10.5 (0.4)                                | 17.8 (0.4)             |                    | 17.7 (1.2)                                | 24.9 (1.2)             |                      |
|                                      |                           | % predicted                               | % predicted            | Difference         | % predicted                               | % predicted            | Difference           |
| FEV <sub>1</sub><br>mean<br>(95% CI) | Control                   | 99.3<br>(96.2, 102.4)                     | 99.7<br>(96.1, 103.3)  | 0.4<br>(-2.1, 2.9) | 102.5<br>(98.1, 106.8)                    | 99.9<br>(95.8, 104.0)  | -2.6<br>(-4.7, -0.5) |
|                                      | EP non BPD                | 96.8<br>(90.7, 103.0)                     | 98.6<br>(91.5, 105.8)  | 1.8<br>(-3.2, 6.8) | 95.4<br>(86.4, 104.3)                     | 94.1<br>(85.8, 102.3)  | -1.3<br>(-5.4, 2.9)  |
|                                      | EP mild BPD               | 90.8<br>(85.9, 95.7)                      | 92.8<br>(87.2, 98.4)   | 2.0<br>(-1.9, 5.8) | 85.8<br>(79.8, 91.8)                      | 88.3<br>(82.6, 93.9)   | 2.5<br>(-0.3, 5.2)   |
|                                      | EP m/s BPD                | 82.7<br>(77.4, 88.1)                      | 85.3<br>(79.4, 91.2)   | 2.5<br>(-1.3, 6.4) | 84.4<br>(76.2, 92.6)                      | 84.6<br>(76.9, 92.3)   | 0.2<br>(-3.7, 4.1)   |
|                                      | Control vs. EP no BPD †   | -2.5<br>(-9.4, 4.4)                       | -1.1<br>(-9.1, 7.0)    |                    | -7.1<br>(-17.1, 2.8)                      | -5.8<br>(-15.1, 3.4)   |                      |
|                                      | Control vs. EP mild BPD † | -8.5<br>(-14.3, -2.7)                     | -6.9<br>(-13.6, -0.2)  | P = 0.763          | -16.7<br>(-24.1, -9.2)                    | -11.6<br>(-18.6, -4.6) | P = 0.042            |
|                                      | Control vs. EP m/s BPD †  | -16.6<br>(-22.8, -10.4)                   | -14.4<br>(-21.3, -7.5) |                    | -18.1<br>(-27.4, -8.8)                    | -15.3<br>(-24.0, -6.6) |                      |

|                                                  |                           |                        |                        |                     |                         |                        |                      |
|--------------------------------------------------|---------------------------|------------------------|------------------------|---------------------|-------------------------|------------------------|----------------------|
| <b>FVC<br/>mean<br/>(95% CI)</b>                 | Control                   | 98.6<br>(95.6, 101.7)  | 99.2<br>(95.9, 102.6)  | 0.6<br>(-1.9, 3.1)  | 98.3<br>(93.8, 102.9)   | 100.1<br>(95.8, 104.3) | 1.7<br>(-0.5, 3.9)   |
|                                                  | EP non BPD                | 95.5<br>(89.5, 101.6)  | 99.5<br>(92.9, 106.1)  | 4.0<br>(-1.1, 9.0)  | 99.5<br>(90.1, 109.0)   | 103.0<br>(94.5, 111.6) | 3.5<br>(-0.89, 7.9)  |
|                                                  | EP mild BPD               | 92.6<br>(87.8, 97.5)   | 93.7<br>(88.5, 98.8)   | 1.0<br>(-2.9, 4.9)  | 86.1<br>(79.8, 92.4)    | 93.1<br>(87.2, 98.9)   | 7.0<br>(4.0, 9.9)    |
|                                                  | EP m/s BPD                | 92.7<br>(87.5, 98.0)   | 98.4<br>(93.0, 103.8)  | 5.7<br>(1.7, 9.6)   | 88.7<br>(80.0, 97.3)    | 92.8<br>(84.9, 100.7)  | 4.1<br>(-0.04, 8.3)  |
|                                                  | Control vs. EP no BPD †   | -3.1<br>(-9.9, 3.7)    | 0.3<br>(-7.1, 7.7)     |                     | 1.2<br>(-9.3, 11.7)     | 3.0<br>(-6.6, 12.6)    |                      |
|                                                  | Control vs. EP mild BPD † | -6.0<br>(-11.8, -0.3)  | -5.6<br>(-11.7, 0.6)   | P = 0.150           | -12.2<br>(-20.0, -4.4)  | -7.0<br>(-14.2, 0.3)   | P = 0.051            |
|                                                  | Control vs. EP m/s BPD †  | -5.9<br>(-12.0, 0.2)   | -0.9<br>(-7.2, 5.5)    |                     | -9.7<br>(-19.5, 0.1)    | -7.3<br>(-16.3, 1.8)   |                      |
| <b>FEV<sub>1</sub>/FVC<br/>mean<br/>(95% CI)</b> | Control                   | 99.5<br>(97.1, 101.9)  | 99.2<br>(96.1, 102.3)  | -0.4<br>(-2.4, 1.6) | 103.0<br>(100.7, 105.3) | 99.2<br>(96.9, 101.5)  | -3.8<br>(-5.4, -2.3) |
|                                                  | EP non BPD                | 100.7<br>(96.0, 105.5) | 98.1<br>(92.0, 104.3)  | -2.6<br>(-6.7, 1.4) | 95.0<br>(90.3, 99.8)    | 90.2<br>(85.6, 94.9)   | -4.8<br>(-8.0, -1.6) |
|                                                  | EP mild BPD               | 97.7<br>(93.9, 101.5)  | 98.7<br>(93.9, 103.5)  | 1.0<br>(-2.1, 4.1)  | 99.4<br>(96.2, 102.5)   | 94.2<br>(91.0, 97.4)   | -5.1<br>(-7.3, -3.0) |
|                                                  | EP m/s BPD                | 88.4<br>(84.3, 92.5)   | 85.8<br>(80.7, 90.9)   | -2.6<br>(-5.7, 0.5) | 95.0<br>(90.6, 99.4)    | 91.6<br>(87.2, 95.9)   | -3.4<br>(-6.5, -0.4) |
|                                                  | Control vs. EP no BPD †   | 1.2<br>(-4.1, 6.5)     | -1.1<br>(-8.0, 5.8)    |                     | -8.0<br>(-13.3, -2.7)   | -9.0<br>(-14.2, -3.8)  |                      |
|                                                  | Control vs. EP mild BPD † | -1.8<br>(-6.3, 2.7)    | -0.5<br>(-6.2, 5.3)    | P = 0.305           | -3.6<br>(-7.6, 0.3)     | -5.0<br>(-8.9, -1.0)   | P = 0.714            |
|                                                  | Control vs. EP m/s BPD †  | -11.1<br>(-15.9, -6.4) | -13.3<br>(-19.3, -7.4) |                     | -8.1<br>(-13.0, -3.1)   | -7.6<br>(-12.6, -2.7)  |                      |

|                                       |                           |                         |                         |                      |                         |                         |                        |
|---------------------------------------|---------------------------|-------------------------|-------------------------|----------------------|-------------------------|-------------------------|------------------------|
| <b>FEF25-75<br/>mean<br/>(95% CI)</b> | Control                   | 97.4<br>(90.9, 103.9)   | 98.7<br>(91.3, 106.0)   | 1.3<br>(-3.1, 5.7)   | 112.6<br>(105.9, 119.3) | 101.5<br>(94.9, 108.2)  | -11.1<br>(-15.4, -6.8) |
|                                       | EP non BPD                | 92.8<br>(80.0, 105.6)   | 95.1<br>(80.6, 109.7)   | 2.4<br>(-6.4, 11.21) | 86.5<br>(72.6, 100.5)   | 74.4<br>(70.0, 87.9)    | -12.1<br>(-21.1, -3.1) |
|                                       | EP mild BPD               | 81.6<br>(71.4, 91.9)    | 91.7<br>(80.2, 103.2)   | 10.1<br>(3.4, 16.8)  | 85.4<br>(76.1, 94.7)    | 78.7<br>(69.7, 87.8)    | -6.7<br>(-12.5, -0.9)  |
|                                       | EP m/s BPD                | 61.6<br>(50.6, 72.7)    | 66.9<br>(54.8, 79.0)    | 5.3<br>(-1.5, 12.0)  | 75.5<br>(62.7, 88.3)    | 72.9<br>(60.5, 85.2)    | -2.6<br>(-10.8, 5.5)   |
|                                       | Control vs. EP no BPD †   | -4.6<br>(-19.0, 9.7)    | -3.5<br>(-19.8, 12.7)   |                      | -26.1<br>(-41.5, -10.6) | -27.1<br>(-42.1, -12.1) |                        |
|                                       | Control vs. EP mild BPD † | -15.8<br>(-27.9, -3.6)  | -6.9<br>(-20.6, 6.7)    | P = 0.174            | -27.2<br>(-38.6, -15.7) | -22.8<br>(-34.0, -11.5) | P = 0.230              |
|                                       | Control vs. EP m/s BPD †  | -35.7<br>(-48.6, -22.9) | -31.8<br>(-45.9, -17.6) |                      | -37.1<br>(-51.6, -22.7) | -28.6<br>(-42.7, -14.6) |                        |

Figures are group mean percentages of predicted (16) with 95% confidence intervals (CI) or group mean differences with 95% CI, except for age (mean value with standard deviations). P-values assess differences between the three subgroups with respect to development from the first to the second examination (mixed linear model of SPSS, tests of group vs. examination interaction). “Differences” denotes mean change from first to second examination. † denotes differences between the control groups and the respective BPD subgroups. *Abbreviations:* FEV<sub>1</sub>: forced expiratory volume in first second; FVC: forced vital capacity; FEF25-75: forced expiratory flow at 25-75% of FVC, EP = subjects born extreme preterm, i.e. with a gestational age ≤ 28 weeks or a birth weight ≤ 1000 gram, BPD = bronchopulmonary dysplasia, mild BPD = oxygen supplement at 28 postnatal days, m/s BPD = moderate/severe BPD, i.e. oxygen supplement at gestational age 36 weeks.
